# Supplementary material for: The Effects of Transglutaminase and Refrigerated Storage on the Physicochemical Properties of Whole Wheat Dough and Noodles
Source: MDPI journal article supplement (doi:10.3390/foods10071675), 2021-07-20
Supplement: s1 [file s1]

**Table S1.** Results of two-way analysis of variance in this study

|                          | Properties                                   | TG Treatment | Refrigerated Storage |
|--------------------------|----------------------------------------------|--------------|----------------------|
| WEAX                     | Ferulic acid of content ( $\mu\text{g/kg}$ ) | ***          | ***                  |
|                          | Yield of WEAX (%)                            | ***          | ***                  |
| Dough                    | Resistance to Extension (g)                  | ***          | ***                  |
|                          | Extensibility                                | ***          | ***                  |
| Color of raw noodles     | L                                            | ***          | ***                  |
|                          | a                                            | ***          | ***                  |
|                          | b                                            | ***          | ***                  |
| Color of cooked noodles  | L                                            | ***          | ***                  |
|                          | a                                            | **           | **                   |
|                          | b                                            | ***          | ***                  |
| TPA of cooked noodles    | Hardness                                     | ***          | ***                  |
|                          | Adhesiveness                                 | ***          | ***                  |
|                          | Springiness                                  | **           | **                   |
|                          | Cohesiveness                                 | **           | ***                  |
|                          | Gumminess                                    | **           | **                   |
|                          | Chewiness                                    | **           | **                   |
|                          | Resilience                                   | **           | **                   |
| Cooking parameters       | Cooking Loss (%)                             | ***          | ***                  |
|                          | Water Absorption (%)                         | ***          | ***                  |
|                          | Swelling index                               | ***          | ***                  |
| Frequency sweep of dough | G' (Elastic Modulus) (kPa)                   | ***          | ***                  |
|                          | G'' (Viscous modulus) (kPa)                  | ***          | ***                  |
|                          | Loss factor ( $\tan \delta$ )                | ***          | ***                  |

**Table S2.** Loss factor ( $\tan \delta$ ) of WWD as a function of frequency.

|                            |          | Transglutaminase concentrations |                   |                   |
|----------------------------|----------|---------------------------------|-------------------|-------------------|
|                            |          | Control**                       | WWD + TG0.1<br>%  | WWD + TG1<br>%    |
| Refrigerated Storage Times | Day 0*** | 0.37 $\pm$ 0.00 aA              | 0.36 $\pm$ 0.01 A | 0.32 $\pm$ 0.01 B |
|                            | Day 1*** | 0.39 $\pm$ 0.00 bA              | 0.36 $\pm$ 0.01 B | 0.31 $\pm$ 0.01 C |
|                            | Day 2*** | 0.38 $\pm$ 0.00 bA              | 0.36 $\pm$ 0.01 B | 0.32 $\pm$ 0.01 C |
|                            | Day 3*** | 0.40 $\pm$ 0.00 cA              | 0.36 $\pm$ 0.01 B | 0.32 $\pm$ 0.00 C |

All values are average of loss factor for overall range of frequency and it is shown as means of three replications  $\pm$  standard deviations. Values with same lowercase letters are not significantly different among refrigerated storage times, while same capital letters are not significantly different among TG concentrations. \*\*, \*\*\* Significantly differ at  $p < 0.01$ ,  $< 0.001$ , respectively.

**Table S3.** Correlation coefficients among rheological properties of WWD and texture profile analysis of WWN

| Index1       | Hardness         | Adhesiveness     | Springiness   | Cohesiveness     | Chewiness       | Resilience      |
|--------------|------------------|------------------|---------------|------------------|-----------------|-----------------|
| R to Ex      | 0.004            | <b>-0.488**</b>  | -0.237        | <b>0.336*</b>    | 0.022           | <b>0.451**</b>  |
| Exten        | <b>-0.727***</b> | <b>-0.642***</b> | 0.244         | <b>0.725***</b>  | <b>-0.432**</b> | <b>0.537**</b>  |
| CL           | 0.123            | <b>0.622***</b>  | -0.053        | <b>-0.404*</b>   | -0.021          | <b>-0.459**</b> |
| WA           | <b>-0.677***</b> | <b>-0.669***</b> | 0.304         | <b>0.745***</b>  | -0.304          | <b>0.477**</b>  |
| SI           | <b>-0.758***</b> | <b>-0.488**</b>  | <b>0.356*</b> | <b>0.683***</b>  | <b>-0.404*</b>  | <b>0.358*</b>   |
| G'           | <b>0.719***</b>  | <b>0.353*</b>    | -0.280        | <b>-0.639***</b> | <b>0.462**</b>  | <b>-0.391**</b> |
| G''          | <b>0.463**</b>   | 0.064            | -0.156        | <b>-0.464**</b>  | <b>0.359*</b>   | -0.283          |
| tan $\delta$ | <b>-0.801***</b> | <b>-0.514**</b>  | <b>0.353*</b> | <b>0.625***</b>  | <b>-0.469**</b> | <b>0.387*</b>   |

<sup>1</sup>R to Ex = resistance to extension (g); Exten = extensibility; CL = cooking loss (%); WA = water absorption (%); SI = swelling index; G' = elastic/storage modulus (kPa); G'' = viscous/loss modulus (kPa); tan  $\delta$  = loss factor.

\*, \*\*, \*\*\* Significantly differ at  $p < 0.05$ ,  $< 0.01$ ,  $< 0.001$ , respectively.
